# Supplementary material for: Clinical Presentation of Cytomegalovirus Meningoencephalitis: A Retrospective Study of 12 Adult Patients with A Variety of Immunocompromised Conditions
Source: Research Square preprint supplement (doi:10.21203/rs.3.rs-5496568/v1), 2025-04-04
Supplement: Supplementary file 1 [file eaf849d3909d40c9088025b5.docx]

**Online Data** **Supplement**

**Clinical Presentation of Cytomegalovirus Meningoencephalitis: A Retrospective Study of 12 Adult Patients with A Variety of Immunocompromised Conditions**Ching-Hao Hsu1,2,3, Yi-Tien Hsuan1, Yu-Jiun Chan1,4,5 and Hsin-Pai Chen1,3

1Division of Infectious Diseases, Department of Medicine, Taipei Veterans General Hospital, Taipei, Taiwan

2Division of Holistic and Multidisciplinary Medicine, Department of Medicine, Taipei Veterans General Hospital, Taipei, Taiwan

3School of Medicine, National Yang Ming Chiao Tung University, Taipei, Taiwan

4Center for Infection Control, Taipei Veterans General Hospital, Taipei, Taiwan

5Institue of Public Health, National Yang Ming Chiao Tung University, Taipei, Taiwan

*Correspondence

Hsin-Pai Chen

hpchen5@vghtpe.gov.tw

**Table S1** Laboratory data of the 12 patients with HCMV central nervous system infection

| **Patient No.** | | **Blood value** | | | | | |  |
| --- | --- | --- | --- | --- | --- | --- | --- | --- |
| **WBC (Cells/uL)** | **Seg.**  **(%)** | **Lym.**  **(%)** | **CRP**  **(mg/dL)** | **Creatine**  **(mg/dL)** | **T-bil**  **(mg/dL)** | **ALT (U/L)** |
| 1 | 7200 | | 89.1 | 9 | 1.5 | 1.14 | 0.87 | 34 |
| 2 | 7300 | | 76.7 | 14 | 0.7 | 0.57 | 1.14 | 43 |
| 3 | 9500 | | 80.2 | 12.3 | 0.5 | 0.83 | 0.58 | 22 |
| 4 | 11900 | | 83.0 | 5.7 | 7.4 | 5.9 | 0.34 | 84 |
| 5 | 9736 | | 48.0 | 36 | 2.9 | 1.06 | 0.73 | 114 |
| 6 | 8800 | | 74.0 | 15.3 | 0.4 | 0.66 | 0.32 | 23 |
| 7 | 5200 | | 87.0 | 4.4 | 4.6 | 0.49 | 0.20 | 14 |
| 8 | 5400 | | 66.5 | 24.1 | 0.03 | 0.47 | 0.53 | 20 |
| 9 | 7600 | | 78.3 | 11.5 | 2.8 | 0.69 | 0.23 | 15 |
| 10 | 8200 | | 49.1 | 31.4 | 0.5 | 0.38 | 0.29 | 21 |
| 11 | 3970 | | 1.0 | 48 | 2.9 | 0.84 | 0.8 | 55 |
| 12 | 17800 | | 91.1 | 4.4 | 1.9 | 0.49 | 0.41 | 64 |

**Abbreviations:** HCMV, human cytomegalovirus; CSF, cerebrospinal fluid; WBC, white blood cell; Seg, segment; Lym, lymphocyte; CRP, c-reactive protein; T-bil, total bilirubin;ALT**,** alanine aminotransferase

**Table S2** Outcome ofthe 12 patients with HCMV CNS infection

| **Patient No.** | **Admission duration (days)** | **Outcome** | **Primary cause of death** | |
| --- | --- | --- | --- | --- |
| 1 | 15 | Deceased | | Die of disseminate HCMV disease. |
| 2 | 70 | Deceased | | CNS tumor related brain hemorrhage, die of brain stem failure |
| 3 | 24 | Survived a | | N/A |
| 4 | 49 | Deceased | | Die of septic shock and progression of urothelial carcinoma |
| 5 | 22 | Deceased | | Die of disseminate HCMV disease |
| 6 | 68 | Survivedb | | N/A |
| 7 | 9 | Deceased | | Die of disseminate HCMV disease |
| 8 | 2 | Deceased | | Die of cancer progression, and brain leptomeningeal seeding. |
| 9 | 36 | SurvivedC | | N/A |
| 10 | 96 | Deceased | | Die of disseminate HCMV disease |
| 11 | 43 | Deceased | | Die of septic shock and progression of leukemia |
| 12 | 40 | Deceased | | Die of cancer progression |

**Abbreviations:** HCMV, human cytomegalovirus; CNS, central nervous system

aThe patient survived but experienced sequelae related to disturbances in consciousness

b The patient survived but exhibited sequelae characterized by decreased muscle power bilaterally

c The patient survived with developed cognitive changes as a sequela
